# Supplementary material for: Paleogenomics illuminates the evolutionary history of the extinct Holocene “horned” crocodile of Madagascar, Voay robustus
Source: PubMed Central journal article supplement (PMC8079395; doi:10.1038/s42003-021-02017-0), 2021-04-27
Supplement: 42003_2021_2017_MOESM1_ESM.pdf [file 42003_2021_2017_MOESM1_ESM.pdf]

Supplementary Figures and Tables for Hekkala et al. 2021 Paleogenomics illuminates the evolutionary history of the extinct Holocene "horned" crocodile of Madagascar, *Voay robustus*

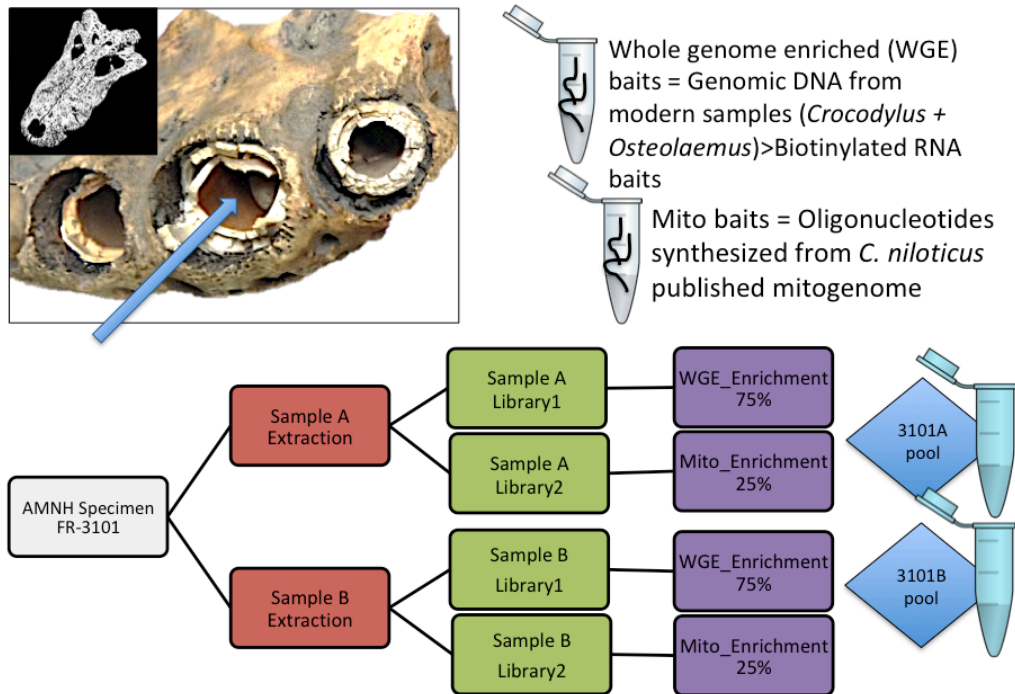

**Supplementary Figure 1.**

Schematic representation of sample processing from sampling to sequencing for subfossil skull of *Voay robustus* (AMNH FR-3101). Negative controls are not depicted.

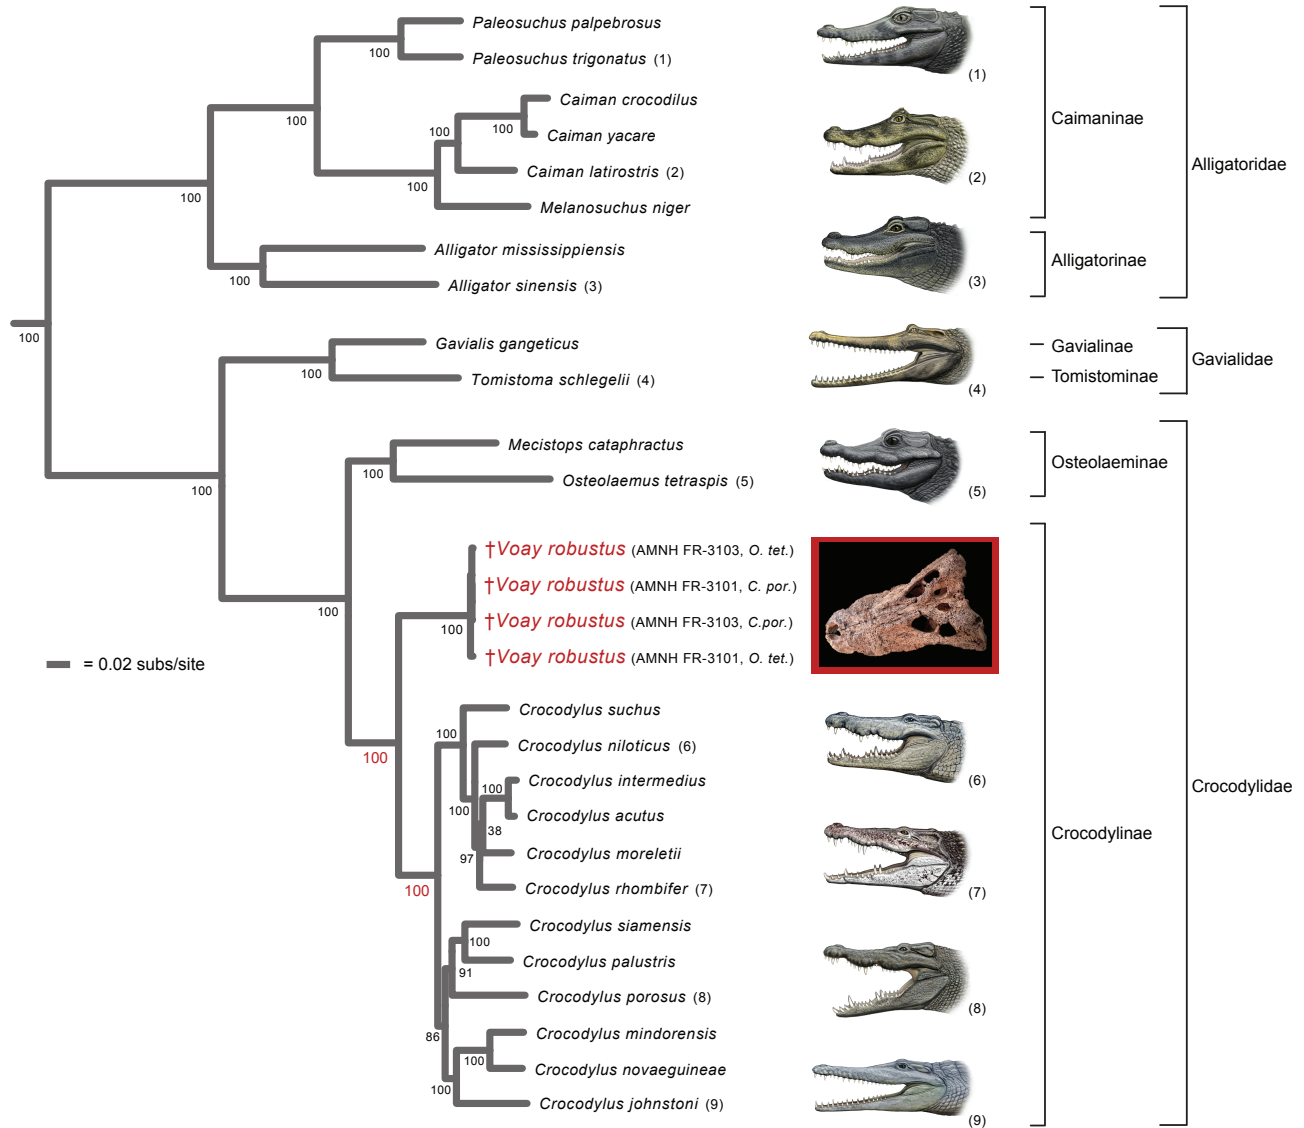

### Supplementary Figure 2.

Phylogenetic relationships of *Voay robustus* (red) based on partial mitochondrial (mt) genomes with estimated branch lengths in expected substitutions per site. Analyses of mt data robustly and consistently support a sister group relationship between *Voay* and a monophyletic *Crocodylus* (true crocodiles). The ML phylogram in this figure is based on the full mtDNA data set (partitioned by gene) with all four builds of the *Voay* mt genome (*Voay* AMNH FR-3101 *C. porosus* reference build, *Voay* AMNH FR-3101 *Osteolaemus* reference build, *Voay* AMNH FR-3103 *C. porosus* reference build and *Voay* AMNH FR-3103 *Osteolaemus* reference build). Note the very short terminal branches for the four mt genome builds for the *Voay* specimens. The tree is rooted with bird, turtle, and lizard outgroups (not shown). Paintings of crocodylians are by C. Buell; photo of *Voay* skull (AMNH FR-3101) is by E. Hekkala.

Supplementary Table 1: RAxML maximum likelihood analyses, PAUP\* parsimony analyses, and BEAST Bayesian tip-dating analyses used to test the stability of phylogenetic results. Trees with support scores can be found in Supplementary Data 2.

| Data Set                          | <i>Voay</i> mt genome builds included in analysis | Partitioning Scheme                                                                                 |
|-----------------------------------|---------------------------------------------------|-----------------------------------------------------------------------------------------------------|
| RAxML maximum likelihood analysis |                                                   |                                                                                                     |
| rDNA, protein-coding              |                                                   |                                                                                                     |
|                                   | 4 reference builds                                | No partitions                                                                                       |
|                                   | 3101 <i>Osteolaemus</i> reference build           | No partitions                                                                                       |
|                                   | 3101 <i>C. porosus</i> reference build            | No partitions                                                                                       |
|                                   | 3103 <i>Osteolaemus</i> reference build           | No partitions                                                                                       |
|                                   | 3103 <i>C. porosus</i> reference build            | No partitions                                                                                       |
|                                   |                                                   |                                                                                                     |
|                                   | 4 reference builds                                | 12S, 16S, ATP6, ATP8, COX1, COX2, COX3, ND1, ND2, ND3, ND4, ND4L, ND5, ND6, CYB                     |
|                                   | 3101 <i>Osteolaemus</i> reference build           | 12S, 16S, ATP6, ATP8, COX1, COX2, COX3, ND1, ND2, ND3, ND4, ND4L, ND5, ND6, CYB                     |
|                                   | 3101 <i>C. porosus</i> reference build            | 12S, 16S, ATP6, ATP8, COX1, COX2, COX3, ND1, ND2, ND3, ND4, ND4L, ND5, ND6, CYB                     |
|                                   | 3103 <i>Osteolaemus</i> reference build           | 12S, 16S, ATP6, ATP8, COX1, COX2, COX3, ND1, ND2, ND3, ND4, ND4L, ND5, ND6, CYB                     |
|                                   | 3103 <i>C. porosus</i> reference build            | 12S, 16S, ATP6, ATP8, COX1, COX2, COX3, ND1, ND2, ND3, ND4, ND4L, ND5, ND6, CYB                     |
|                                   |                                                   |                                                                                                     |
|                                   | 4 reference builds                                | 12S 16S stems, 12S 16S loops, ATP6, ATP8, COX1, COX2, COX3, ND1, ND2, ND3, ND4, ND4L, ND5, ND6, CYB |
|                                   | 3101 <i>Osteolaemus</i> reference build           | 12S 16S stems, 12S 16S loops, ATP6, ATP8, COX1, COX2, COX3, ND1, ND2, ND3, ND4, ND4L, ND5, ND6, CYB |
|                                   | 3101 <i>C. porosus</i> reference build            | 12S 16S stems, 12S 16S loops, ATP6, ATP8, COX1, COX2, COX3, ND1, ND2, ND3, ND4, ND4L, ND5, ND6, CYB |

|                                                     |                                         |                                                                                                     |
|-----------------------------------------------------|-----------------------------------------|-----------------------------------------------------------------------------------------------------|
|                                                     | 3103 <i>Osteolaemus</i> reference build | 12S 16S stems, 12S 16S loops, ATP6, ATP8, COX1, COX2, COX3, ND1, ND2, ND3, ND4, ND4L, ND5, ND6, CYB |
|                                                     | 3103 <i>C. porosus</i> reference build  | 12S 16S stems, 12S 16S loops, ATP6, ATP8, COX1, COX2, COX3, ND1, ND2, ND3, ND4, ND4L, ND5, ND6, CYB |
|                                                     |                                         |                                                                                                     |
|                                                     | 4 reference builds                      | 12S, 16S, 1 <sup>st</sup> , 2 <sup>nd</sup> , 3 <sup>rd</sup>                                       |
|                                                     | 3101 <i>Osteolaemus</i> reference build | 12S, 16S, 1 <sup>st</sup> , 2 <sup>nd</sup> , 3 <sup>rd</sup>                                       |
|                                                     | 3101 <i>C. porosus</i> reference build  | 12S, 16S, 1 <sup>st</sup> , 2 <sup>nd</sup> , 3 <sup>rd</sup>                                       |
|                                                     | 3103 <i>Osteolaemus</i> reference build | 12S, 16S, 1 <sup>st</sup> , 2 <sup>nd</sup> , 3 <sup>rd</sup>                                       |
|                                                     | 3103 <i>C. porosus</i> reference build  | 12S, 16S, 1 <sup>st</sup> , 2 <sup>nd</sup> , 3 <sup>rd</sup>                                       |
|                                                     |                                         |                                                                                                     |
|                                                     | 4 reference builds                      | 12S 16S stems, 12S 16S loops, 1 <sup>st</sup> , 2 <sup>nd</sup> , 3 <sup>rd</sup>                   |
|                                                     | 3101 <i>Osteolaemus</i> reference build | 12S 16S stems, 12S 16S loops, 1 <sup>st</sup> , 2 <sup>nd</sup> , 3 <sup>rd</sup>                   |
|                                                     | 3101 <i>C. porosus</i> reference build  | 12S 16S stems, 12S 16S loops, 1 <sup>st</sup> , 2 <sup>nd</sup> , 3 <sup>rd</sup>                   |
|                                                     | 3103 <i>Osteolaemus</i> reference build | 12S 16S stems, 12S 16S loops, 1 <sup>st</sup> , 2 <sup>nd</sup> , 3 <sup>rd</sup>                   |
|                                                     | 3103 <i>C. porosus</i> reference build  | 12S 16S stems, 12S 16S loops, 1 <sup>st</sup> , 2 <sup>nd</sup> , 3 <sup>rd</sup>                   |
|                                                     |                                         |                                                                                                     |
| rDNA, protein-coding<br>(no 3 <sup>rd</sup> codons) |                                         |                                                                                                     |
|                                                     | 4 reference builds                      | 12S 16S stems, 12S 16S loops, 1 <sup>st</sup> , 2 <sup>nd</sup>                                     |
|                                                     | 3101 <i>Osteolaemus</i> reference build | 12S 16S stems, 12S 16S loops, 1 <sup>st</sup> , 2 <sup>nd</sup>                                     |
|                                                     | 3101 <i>C. porosus</i> reference build  | 12S 16S stems, 12S 16S loops, 1 <sup>st</sup> , 2 <sup>nd</sup>                                     |
|                                                     | 3103 <i>Osteolaemus</i> reference build | 12S 16S stems, 12S 16S loops, 1 <sup>st</sup> , 2 <sup>nd</sup>                                     |
|                                                     | 3103 <i>C. porosus</i> reference build  | 12S 16S stems, 12S 16S loops, 1 <sup>st</sup> , 2 <sup>nd</sup>                                     |
|                                                     |                                         |                                                                                                     |
| protein-coding                                      |                                         |                                                                                                     |
|                                                     | 4 reference builds                      | No partitions                                                                                       |
|                                                     | 3101 <i>Osteolaemus</i> reference build | No partitions                                                                                       |
|                                                     | 3101 <i>C. porosus</i> reference build  | No partitions                                                                                       |
|                                                     | 3103 <i>Osteolaemus</i> reference build | No partitions                                                                                       |

|                                            |                                         |                                                                       |
|--------------------------------------------|-----------------------------------------|-----------------------------------------------------------------------|
|                                            | 3103 <i>C. porosus</i> reference build  | No partitions                                                         |
|                                            | 4 reference builds                      | ATP6, ATP8, COX1, COX2, COX3, ND1, ND2, ND3, ND4, ND4L, ND5, ND6, CYB |
|                                            | 3101 <i>Osteolaemus</i> reference build | ATP6, ATP8, COX1, COX2, COX3, ND1, ND2, ND3, ND4, ND4L, ND5, ND6, CYB |
|                                            | 3101 <i>C. porosus</i> reference build  | ATP6, ATP8, COX1, COX2, COX3, ND1, ND2, ND3, ND4, ND4L, ND5, ND6, CYB |
|                                            | 3103 <i>Osteolaemus</i> reference build | ATP6, ATP8, COX1, COX2, COX3, ND1, ND2, ND3, ND4, ND4L, ND5, ND6, CYB |
|                                            | 3103 <i>C. porosus</i> reference build  | ATP6, ATP8, COX1, COX2, COX3, ND1, ND2, ND3, ND4, ND4L, ND5, ND6, CYB |
|                                            |                                         |                                                                       |
| protein-coding (no 3 <sup>rd</sup> codons) |                                         |                                                                       |
|                                            | 4 reference builds                      | 1 <sup>st</sup> , 2 <sup>nd</sup>                                     |
|                                            | 3101 <i>Osteolaemus</i> reference build | 1 <sup>st</sup> , 2 <sup>nd</sup>                                     |
|                                            | 3101 <i>C. porosus</i> reference build  | 1 <sup>st</sup> , 2 <sup>nd</sup>                                     |
|                                            | 3103 <i>Osteolaemus</i> reference build | 1 <sup>st</sup> , 2 <sup>nd</sup>                                     |
|                                            | 3103 <i>C. porosus</i> reference build  | 1 <sup>st</sup> , 2 <sup>nd</sup>                                     |
|                                            |                                         |                                                                       |
| rDNA                                       | 4 reference builds                      | No partitions                                                         |
|                                            | 3101 <i>Osteolaemus</i> reference build | No partitions                                                         |
|                                            | 3101 <i>C. porosus</i> reference build  | No partitions                                                         |
|                                            | 3103 <i>Osteolaemus</i> reference build | No partitions                                                         |
|                                            | 3103 <i>C. porosus</i> reference build  | No partitions                                                         |
|                                            |                                         |                                                                       |
|                                            | 4 reference builds                      | 12S, 16S                                                              |
|                                            | 3101 <i>Osteolaemus</i> reference build | 12S, 16S                                                              |
|                                            | 3101 <i>C. porosus</i> reference build  | 12S, 16S                                                              |
|                                            | 3103 <i>Osteolaemus</i> reference build | 12S, 16S                                                              |
|                                            | 3103 <i>C. porosus</i> reference build  | 12S, 16S                                                              |

|  |                                         |                              |
|--|-----------------------------------------|------------------------------|
|  |                                         |                              |
|  | 4 reference builds                      | 12S 16S stems, 12S 16S loops |
|  | 3101 <i>Osteolaemus</i> reference build | 12S 16S stems, 12S 16S loops |
|  | 3101 <i>C. porosus</i> reference build  | 12S 16S stems, 12S 16S loops |
|  | 3103 <i>Osteolaemus</i> reference build | 12S 16S stems, 12S 16S loops |
|  | 3103 <i>C. porosus</i> reference build  | 12S 16S stems, 12S 16S loops |

PAUP\* parsimony analysis (equal weighting and Goloboff weighting with k=4, 8, or 12)

|                      |                    |               |
|----------------------|--------------------|---------------|
| rDNA, protein-coding | 4 reference builds | No partitions |
|----------------------|--------------------|---------------|

BEAST tip-dating analyses (Lee and Yates morphology matrix)

|                |                                         |                                                     |
|----------------|-----------------------------------------|-----------------------------------------------------|
| protein-coding | 3101 <i>C. porosus</i> reference build  | 1 <sup>st</sup> , 2 <sup>nd</sup> , 3 <sup>rd</sup> |
|                | 3101 <i>Osteolaemus</i> reference build | 1 <sup>st</sup> , 2 <sup>nd</sup> , 3 <sup>rd</sup> |
|                |                                         |                                                     |

|                                            |                                         |                                   |
|--------------------------------------------|-----------------------------------------|-----------------------------------|
| protein-coding (no 3 <sup>rd</sup> codons) | 3101 <i>C. porosus</i> reference build  | 1 <sup>st</sup> , 2 <sup>nd</sup> |
|                                            | 3101 <i>Osteolaemus</i> reference build | 1 <sup>st</sup> , 2 <sup>nd</sup> |

BEAST tip-dating analyses (Brochu morphology matrix)

|                |                                        |                                                     |
|----------------|----------------------------------------|-----------------------------------------------------|
| protein-coding | 3101 <i>C. porosus</i> reference build | 1 <sup>st</sup> , 2 <sup>nd</sup> , 3 <sup>rd</sup> |
|----------------|----------------------------------------|-----------------------------------------------------|

|                                            |                                        |                                   |
|--------------------------------------------|----------------------------------------|-----------------------------------|
| protein-coding (no 3 <sup>rd</sup> codons) | 3101 <i>C. porosus</i> reference build | 1 <sup>st</sup> , 2 <sup>nd</sup> |
|--------------------------------------------|----------------------------------------|-----------------------------------|
