# Supplementary material for: Paleogenomics illuminates the evolutionary history of the extinct Holocene “horned” crocodile of Madagascar, Voay robustus
Source: PubMed Central journal article supplement (PMC8079395; doi:10.1038/s42003-021-02017-0), 2021-04-27
Supplement: 42003_2021_2017_MOESM2_ESM.pdf [file 42003_2021_2017_MOESM2_ESM.pdf]

## Description of Additional Supplementary Files

**File name:** Supplementary Data 1

**Description:** Voay mtDNA alignment nexus file

**File name:** Supplementary Data 2

**Description:** Voay RAXML BEAST trees text file

**File name:** Supplementary Data 3

**Description:** RAxML maximum likelihood analyses, PAUP\* parsimony analyses, and BEAST Bayesian tip-dating analyses used to test the stability of phylogenetic results. Trees with support scores can be found in Supplementary Data 2.
